# Supplementary material
Source: Springer Nature journal article supplement (https://www.springermedizin.de/resource/supplementary/12958_2008_439_MOESM11_ESM.pdf/9567888)

PT: COW 34L  
ID:  
RBRU-U OF S  
C7 E5  
LSPTRAD 13M10.7  
LSPD8 C7 E5  
HD1

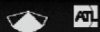

02 JUL 93  
11:37 AM

5

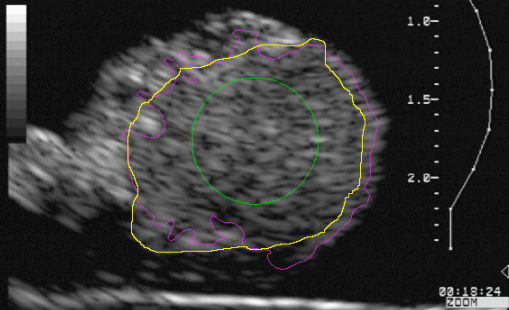

PT: COW 42 RO  
ID:  
RBRU-U OF S  
C7 E5  
LSPTRAD 13M10.7  
LSPD8 C7 E5  
HD1

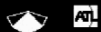

13 MAY 93  
2:22 PM

6

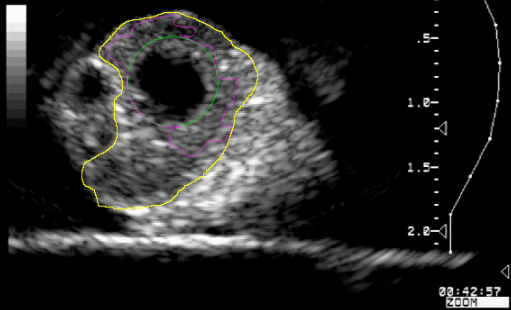

PT: COW 68L  
ID:  
RBRU-U OF S  
C7 E5  
LSPTRAD 13M10.7  
LSPD8 C7 E5  
HD1

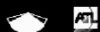

17 MAY 93  
10:15 AM

7

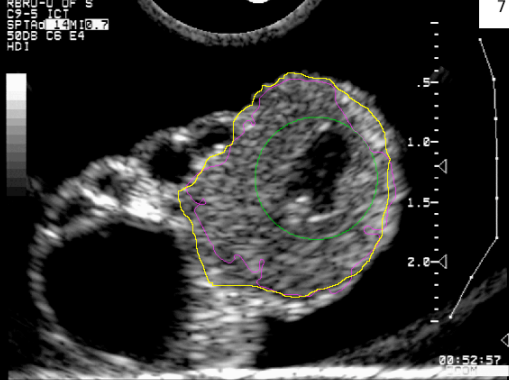

PT: COW 71R  
ID:  
RBRU-U OF S  
C7 E5  
LSPTRAD 13M10.7  
LSPD8 C7 E5  
HD1

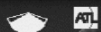

28 JUN 93  
1:47 PM

8

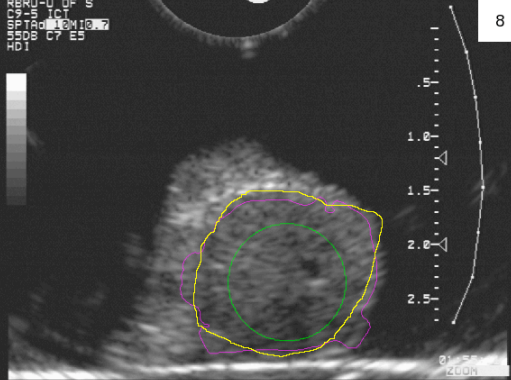

Supplement: MOESM11 [file 9567888]
